# Supplementary material
Source: PubMed Central journal article supplement (PMC4899285)
Supplement: NIHMS781793-supplement.pdf [file NIHMS781793-supplement.pdf]

**Supplemental Table 1. Sequences and modifications of antagomirs**

| <b>antagomir</b>     | <b>antagomir sequence (5'→3')</b>                               |
|----------------------|-----------------------------------------------------------------|
| anti-Ce-mir-67       | mU*mC*mUmAmCmUmCmUmUmUmCmUmAmGmGmAmGmGmUmU*mG*mU*mG*mA-Chl      |
| anti-Ce-mir-67-DY547 | DY547*mU*mCmUmAmCmUmCmUmUmUmCmUmAmGmGmAmGmGmUmU*mG*mU*mG*mA-Chl |
| anti-mir-196b        | mC*mC*mCmAmAmCmAmAmCmAmGmGmAmAmAmCmUmA*mC*mC*mU*mA-Chl          |
| anti-mir-10a         | mC*mA*mCmAmAmAmUmUmCmGmGmAmUmCmUmAmCmAmG*mG*mG*mU*mA-Chl        |
| anti-mir-191         | mC*mA*mGmCmUmGmCmUmUmUmUmGmGmGmAmUmUmCmC*mG*mU*mU*mG-Chl        |
| anti-mir-93*         | mC*mG*mGmGmAmAmGmUmGmCmUmAmGmCmUmCmAmG*mC*mA*mG*mU-Chl          |
| anti-mir-17          | mC*mU*mAmCmCmUmGmCmAmCmUmGmUmAmAmGmCmAmC*mU*mU*mU*mG-Chl        |
| anti-mir-18a         | mC*mU*mAmUmCmUmGmCmAmCmUmAmGmAmUmGmCmAmC*mC*mU*mU*mA-Chl        |
| anti-mir-19a         | mU*mC*mAmGmUmUmUmUmGmCmAmUmAmGmAmUmUmUmG*mC*mA*mC*mA-Chl        |
| anti-mir-19b-1       | mU*mC*mAmGmUmUmUmUmGmCmAmUmGmGmAmUmUmUmG*mC*mA*mC*mA-Chl        |
| anti-mir-20a         | mC*mU*mAmCmCmUmGmCmAmCmUmAmUmAmAmGmCmAmC*mU*mU*mU*mA-Chl        |
| anti-mir-92a-1       | mA*mC*mAmGmGmCmCmGmGmGmAmCmAmAmGmUmGmC*mA*mA*mU*mA-Chl          |

Antagomir sequences are depicted above. Stars (\*) indicate phosphorothioate modifications to phosphodiester linkages. Lower-case m preceding nucleotide letter indicates 2'-O-Me modifications to the furanose ring.
